# Supplementary material for: Functionalized mesoporous silica material and anionic dye adsorption: MCM-41 incorporated with amine groups for competitive adsorption of Acid Fuchsine and Acid Orange II
Source: Royal Society of Chemistry journal article supplement (doi:10.1039/c4ra11737a), 2014-01-01
Supplement: c4ra11737a1.pdf [file c4ra11737a1.pdf]

## Electronic Supplementary Information

### Functionalized mesoporous silica material and anionic dye adsorption: MCM-41 incorporated with amine groups for competitive adsorption of Acid Fuchsine and Acid Orange II

Yunhai Wu<sup>ab\*</sup>, Meili Zhang<sup>b</sup>, Huaiyang Zhao<sup>b</sup>, Shengxin Yang<sup>b</sup>, Aynigar Arkin<sup>b</sup>

<sup>a</sup> Key Laboratory of Integrated Regulation and Resources Development of Shallow

Lakes, Ministry of Education, Hohai University, 1st Xikang Road, Nanjing 210098

(China). Fax: +86-25-83786697; Tel: +86-25-83786697. E-mail: smilehhu@sina.com

<sup>b</sup> College of Environment, Hohai University, 1st Xikang Road, Nanjing 210098

(China).

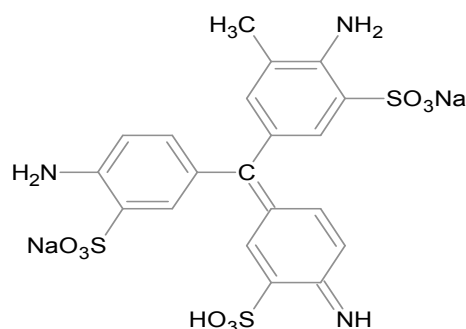

a: AF, C<sub>20</sub>H<sub>17</sub>N<sub>3</sub>Na<sub>2</sub>O<sub>9</sub>S<sub>3</sub>, molecular weight: 585.5

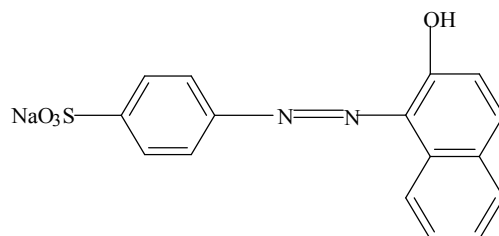

b: AO, C<sub>16</sub>H<sub>11</sub>N<sub>2</sub>NaO<sub>4</sub>S, molecular weight: 350.3

**Fig. S1** Molecular structure of the selected basic anionic dyes for the current adsorption study. a:

AF, b: AO.

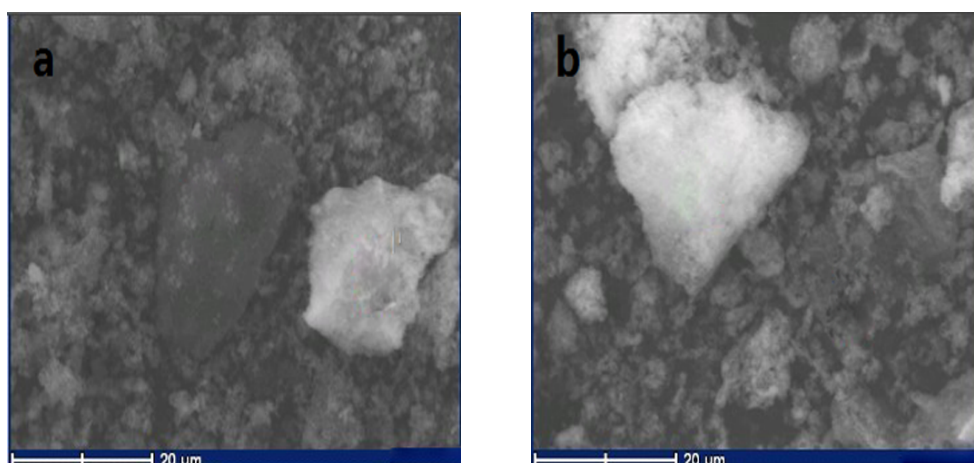

**Fig. S2** SEM surface morphology. a: MCM-41, b: NH<sub>2</sub>-MCM-41.

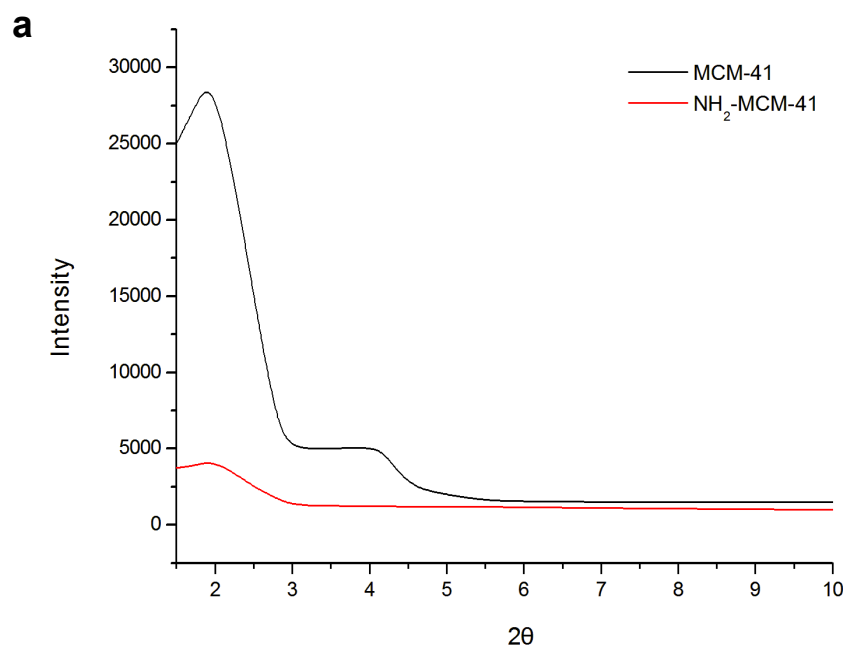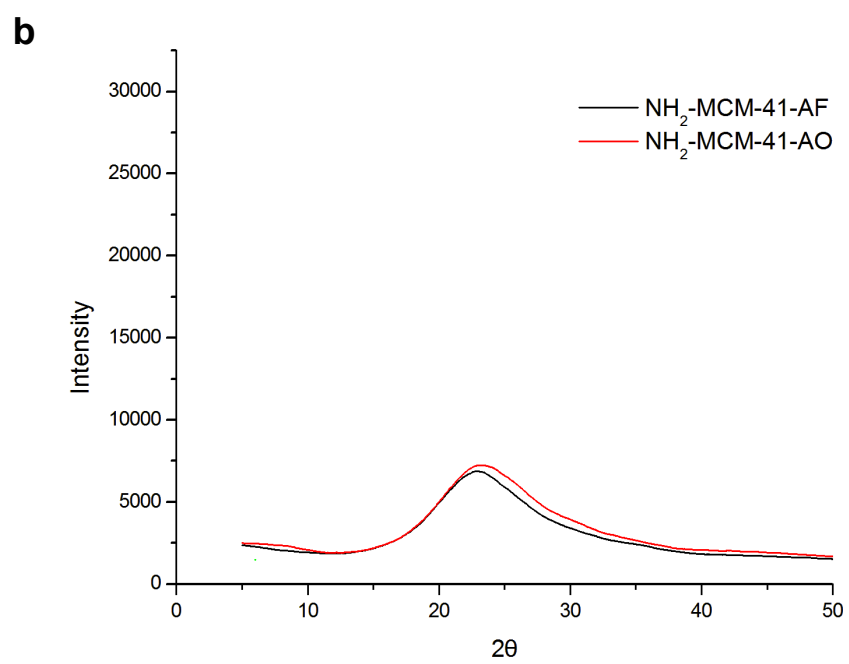

**Fig. S3** (a) XRD pattern of MCM-41 and NH<sub>2</sub>-MCM-41.

(b) XRD pattern of NH<sub>2</sub>-MCM-41-AF and NH<sub>2</sub>-MCM-41-AO.

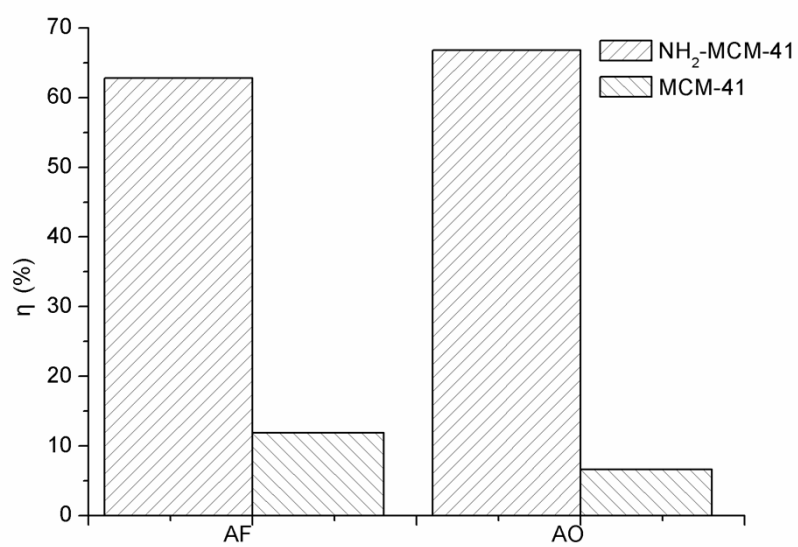

**Fig. S4** The adsorptive removal ratios of AO and AF on MCM-41 before and after amine functionalization.

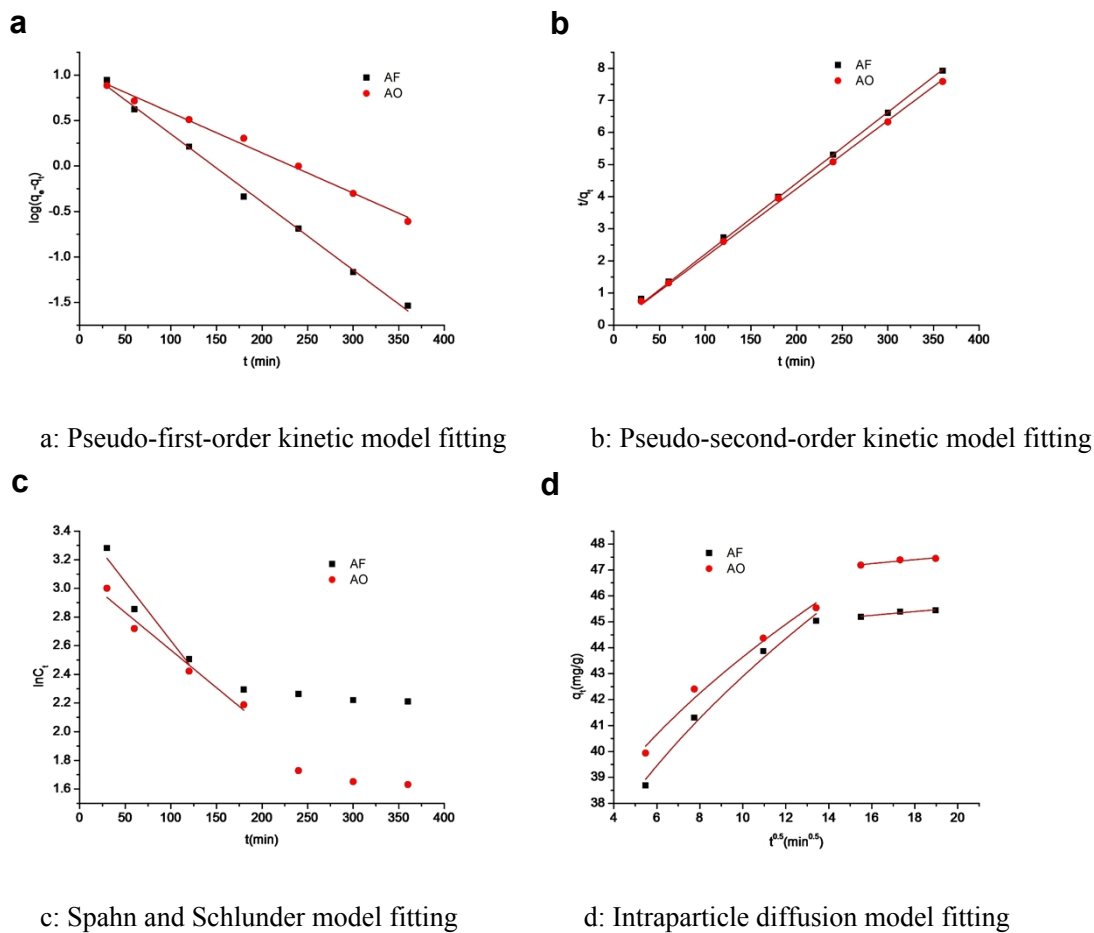

**Fig. S5** Adsorption kinetics of AF and AO onto NH<sub>2</sub>-MCM-41 in single component systems. a: Pseudo-first-order kinetic model fitting, b: Pseudo-second-order kinetic model fitting, c: Spahn and Schlunder model fitting, d: Intraparticle diffusion model fitting. (Conditions: pH 2.0 for AF and pH 3.0 for AO, 25 °C, NH<sub>2</sub>-MCM-41 dosage 2.0 g/L.)

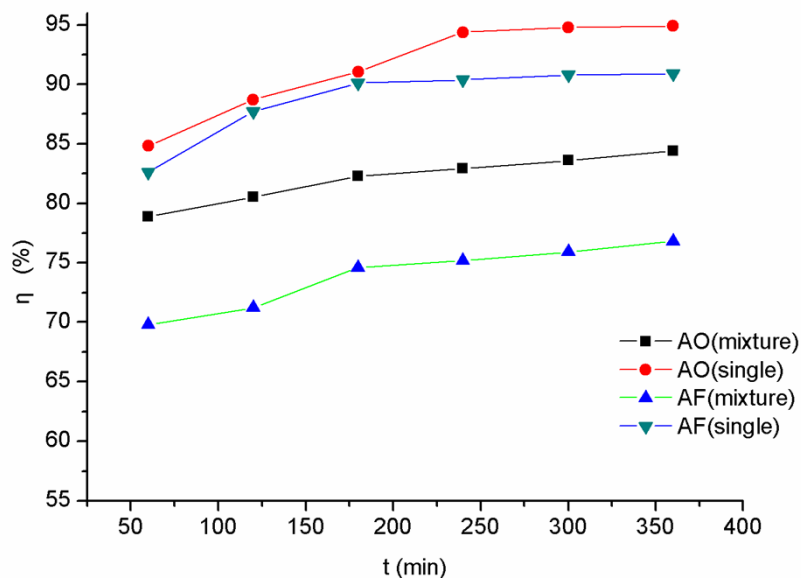

**Fig. S6** Effect of contact time on adsorption of the two anionic dyes in binary component systems.

(Conditions: pH 2.0, 25 °C, NH<sub>2</sub>-MCM-41 dosage 2.0 g/L, dye concentration 100mg/L.)

**Table S1** Adsorption isotherm constants for adsorption of AO and AF onto NH<sub>2</sub>-MCM-41 at various temperatures in binary component systems.

| Dyes | Temperature(°C) | Langmuir |        |        | Freundlich |        |        |
|------|-----------------|----------|--------|--------|------------|--------|--------|
|      |                 | $q_m$    | $K_L$  | $R^2$  | $K_F$      | $n$    | $R^2$  |
| AF   | 25              | 75.4620  | 0.0365 | 0.9986 | 5.6680     | 1.7916 | 0.9811 |
| AO   | 25              | 75.8369  | 0.0786 | 0.9903 | 10.6100    | 2.1176 | 0.9245 |

**Table S2** Kinetic parameters for adsorption of AF and AO onto NH<sub>2</sub>-MCM-41 in binary component systems.

| Dyes | Pseudo-first-order kinetic model |        |        | Pseudo-second-order kinetic model |         |        | Spahn and Schlunder model |        | Intraparticle diffusion model |        |           |        |
|------|----------------------------------|--------|--------|-----------------------------------|---------|--------|---------------------------|--------|-------------------------------|--------|-----------|--------|
|      | $k_1$                            | $q_e$  | $R^2$  | $k_2$                             | $q_e$   | $R^2$  | $k_{ext}$                 | $R^2$  | $k_{p,2}$                     | $R^2$  | $k_{p,3}$ | $R^2$  |
| AF   | 0.0056                           | 1.6291 | 0.9678 | 0.0672                            | 18.9268 | 0.9974 | 0.0014                    | 0.8778 | 1.3036                        | 0.7724 | 0.9682    | 0.9818 |
| AO   | 0.0048                           | 1.4580 | 0.9889 | 0.0307                            | 20.8688 | 0.9988 | 0.0015                    | 0.9964 | 0.9559                        | 0.9660 | 0.8756    | 0.9858 |
